# Supplementary material for: A Large Polysaccharide Produced by Helicobacter hepaticus Induces an Anti-inflammatory Gene Signature in Macrophages
Source: PubMed Central journal article supplement (PMC5734933; doi:10.1016/j.chom.2017.11.002), 2017-12-13
Supplement: mmc1.pdf [file mmc1.pdf]

Cell Host & Microbe, Volume 22

## Supplemental Information

**A Large Polysaccharide Produced by *Helicobacter***

***hepaticus* Induces an Anti-inflammatory Gene**

**Signature in Macrophages**

**Camille Danne, Grigory Ryzhakov, Maria Martínez-López, Nicholas Edward Ilott, Fanny Franchini, Fiona Cuskin, Elisabeth C. Lowe, Samuel J. Bullers, J. Simon C. Arthur, and Fiona Powrie**

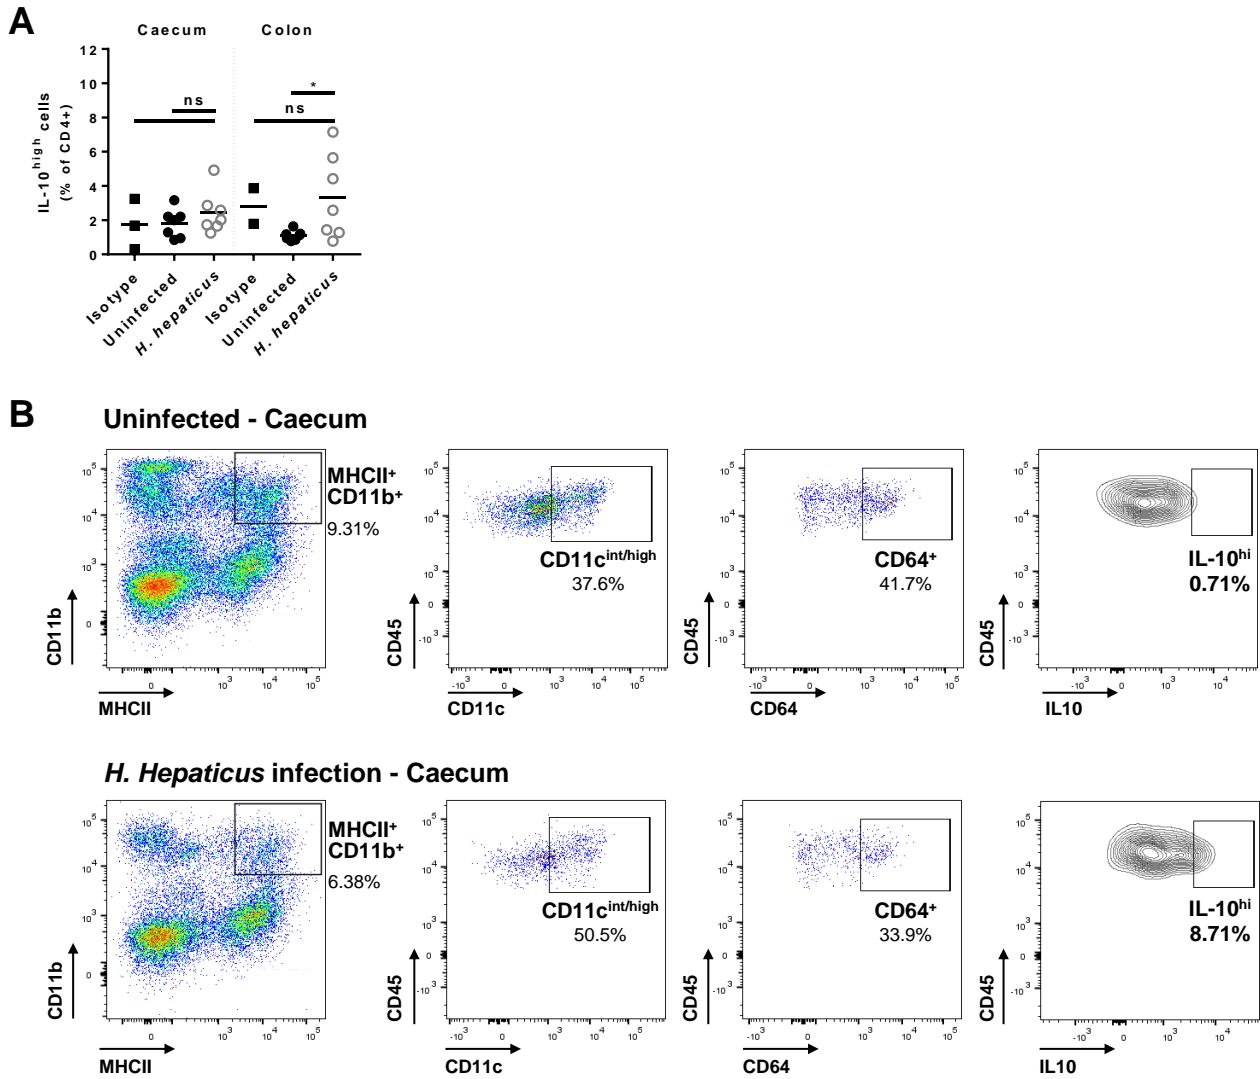

**Figure S1. *H. hepaticus* induces IL-10 in gut resident macrophages but not in T cells. Related to Figure 1.** (A) Frequency of IL-10<sup>high</sup> cells among total CD4<sup>+</sup> T cells in caecum and colon LPL after *H. hepaticus* infection, using an APC anti-mouse IL-10 antibody (clone JES5-16E3) or its isotype control (Rat IgG2b,  $\kappa$ ). Mann-Whitney test,  $p < 0.05$ . (B) Gating of MHCII<sup>+</sup>CD11b<sup>+</sup>CD11c<sup>int/hi</sup>CD64<sup>+</sup>IL-10<sup>high</sup> cells showing one representative sample of the uninfected and *H. hepaticus*-infected caecum groups. Percentages of parent population are indicated.

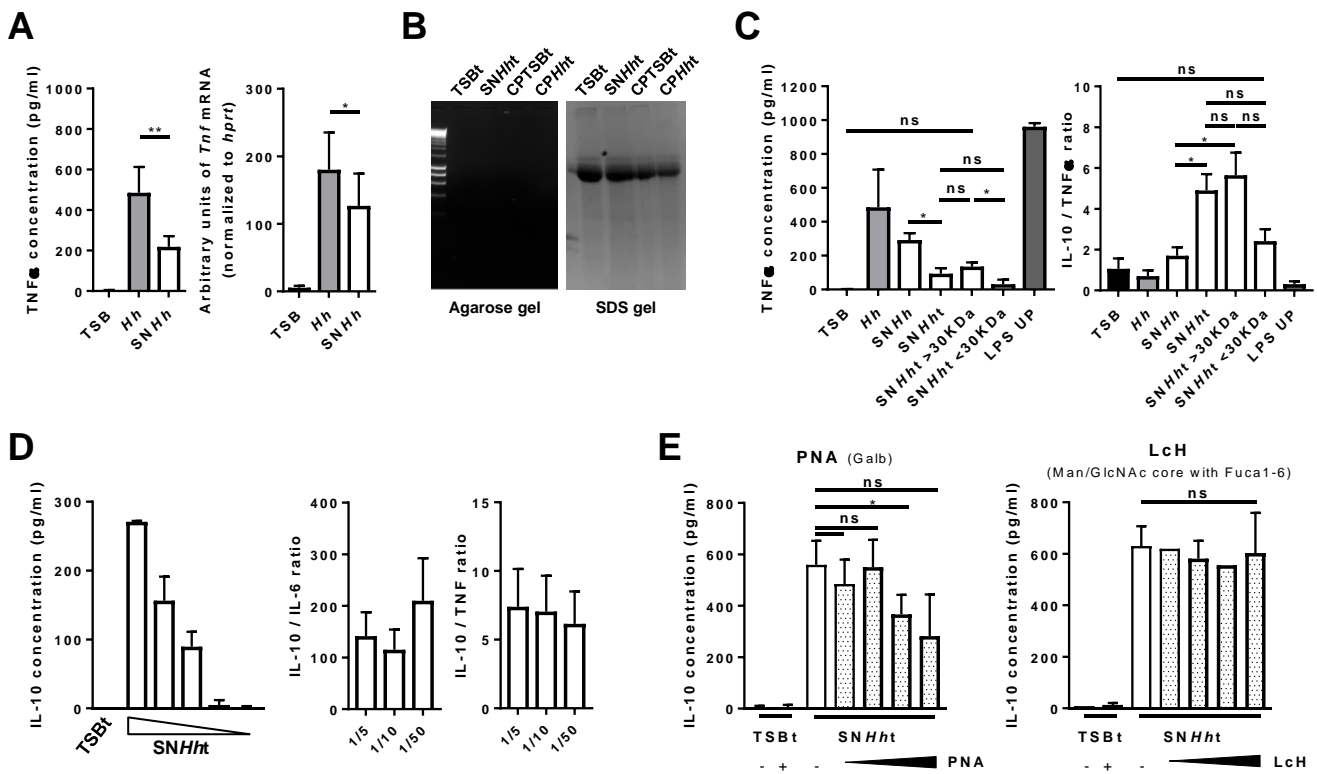

**Figure S2. *H. hepaticus* produces a large soluble polysaccharide inducing high IL-10 but low TNF $\alpha$  production in macrophages. Related to Figure 2.** (A) mRNA and protein induction of the cytokine TNF $\alpha$  after stimulation with control medium (TSBt), *H. hepaticus* whole bacteria (*Hh*) or *H. hepaticus* filtered cultured supernatant (SNHht). (B) Agarose and SDS-page gels of the samples after enzymatic treatment and boiling (TSBt, control medium; SNHht, treated *H. hepaticus* supernatant) and cold-ethanol precipitation (CPTSBt, crude polysaccharide fraction of TSBt; CPHht, crude polysaccharide fraction of SNHht). The agarose gel shows no contaminating DNA. The SDS-page gel shows one band present in all samples that corresponds to the proteinase K used to treat the samples, and no other significant protein contamination. (C) Induction of TNF $\alpha$  and IL-10/TNF $\alpha$  ratio after a 3 h stimulation with SNHht treated with a combination of DNase, RNase and proteinase K and boiled (2 h, 95 °C) (SNHht), SNHht fractionated by size using 30KDa Vivaspin columns (SNHht>30KDa and SNHht<30KDa), and LPS UP. (D) Dose-dependent induction of IL-10 after a 3 h stimulation with SNHht and the calculated IL-10/IL-6 and IL-10/TNF $\alpha$  ratios. (E) Induction of IL-10 after 3 h stimulation with TSBt, LPS or SNHht depleted using various v/v concentrations of Peanut agglutinin (PNA) or Lentil (LcH)-coated lectin beads. Data from three independent experiments. Mann-Whitney test,  $p < 0.05$ . Mean  $\pm$  SD.

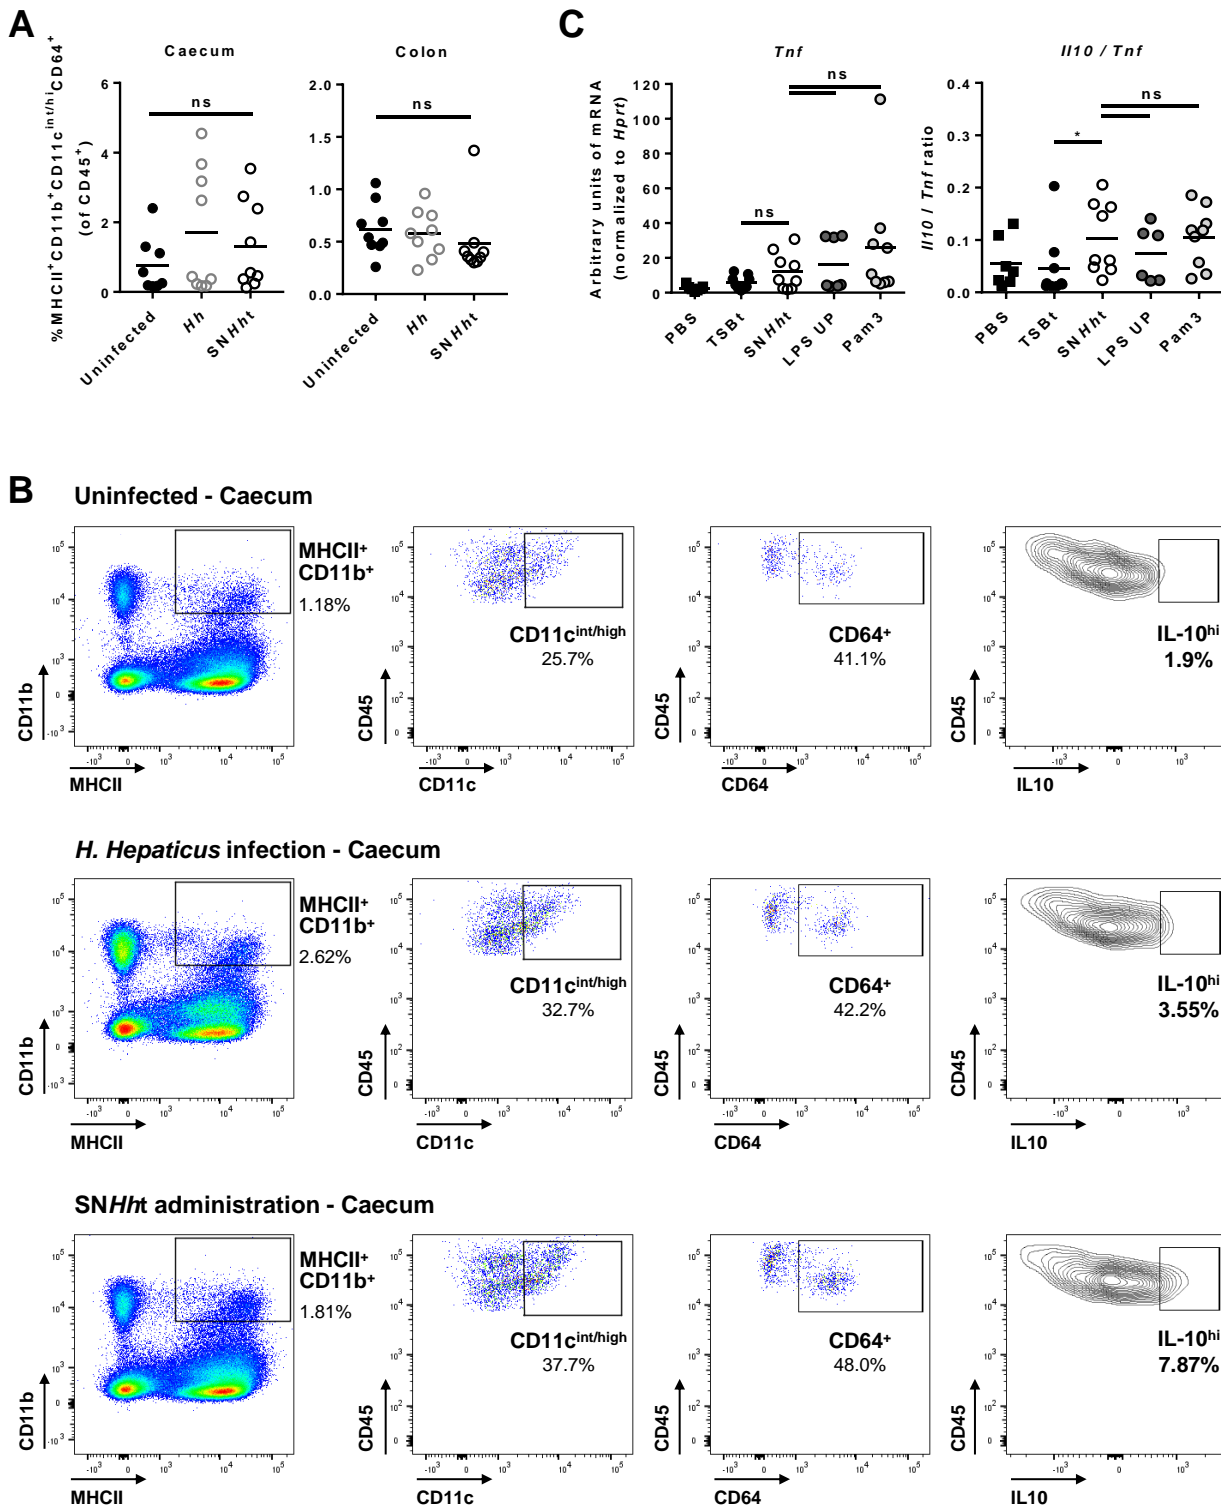

**Figure S3. *H. hepaticus* polysaccharide does not increase the frequency of lamina-propria resident macrophages and induces limited amount of TNF $\alpha$  when injected intraperitoneally. Related to Figure 3.** (A) Frequency of resident macrophages among total CD45<sup>+</sup> cells from caecum and colon LPL. SPF WT mice were infected with *Hh*, or orally gavaged with TSBt or SNHht for 3 days. (B) Gating of MHCII<sup>+</sup>CD11b<sup>+</sup>CD11c<sup>int/hi</sup>CD64<sup>+</sup>IL-10<sup>high</sup> cells showing one representative sample of caecum from mice infected or not with *H. hepaticus* or after administration of SNHht. Percentages of parent population are indicated. (C) *tnf* mRNA expression levels and *Il10/Tnf* ratio in the peritoneal cell fraction after 6 h challenge. Each stimulus (TSBt and SNHht, 200 ml; LPS UP and Pam3, 50 mg) were injected in the intraperitoneal cavity of SPF WT mice. Each symbol represents an individual mouse (three independent experiments). Mann-Whitney test,  $p < 0.05$ .

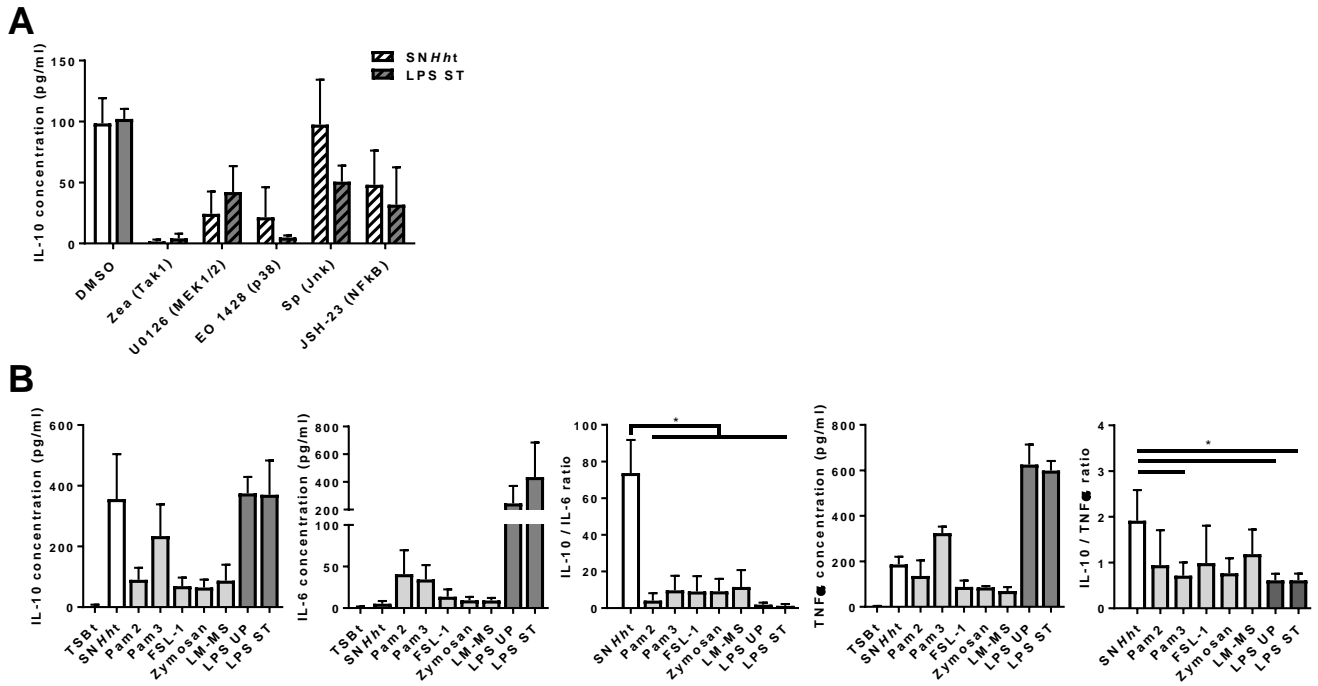

**Figure S4. *H. hepaticus* polysaccharide signals through the classical TLR2/MyD88 pathway but triggers higher anti-inflammatory ratios compared to canonical TLR2 ligands. Related to Figure 4.** (A) Induction of IL-10 production in WT BMDMs pre-treated for 30 min with a kinase inhibitor or DMSO prior stimulation for 3 h with *SNHht* or LPS ST. Zea (5z-7-oxozeanol, Tak1) at 1 mM, UO126 (MEK1/2), JSH-23 (NF- $\kappa$ b) and Sp600125 (JNK) at used at 10 mM and EO 1428 (p38) at 5 mM. (B) IL-10, IL-6 and TNF $\alpha$  production, and IL-10/IL-6 and IL-10/TNF $\alpha$  protein ratios induced by various TLR2 and TLR4 ligands after 3 h stimulation. Pam2 (Pam2CSK4, TLR2/6 ligand); Pam3 (Pam3CSK4, TLR2/1 ligand); FSL-1 (TLR2/6 ligand); Zymosan, cell wall from *Saccharomyces cerevisiae* (TLR2 ligand); LM-MS, Lipomannan from *Mycobacterium smegmatis* (TLR2 ligand); LPS UP, LPS ultrapure from *E. coli* O111:B4 (TLR4 ligand); LPS ST, LPS standard from *E. coli* O55:B5 (TLR4 and TLR2 ligand). Data from three independent experiments. Mann-Whitney test,  $p < 0.05$ . Mean  $\pm$  SD.

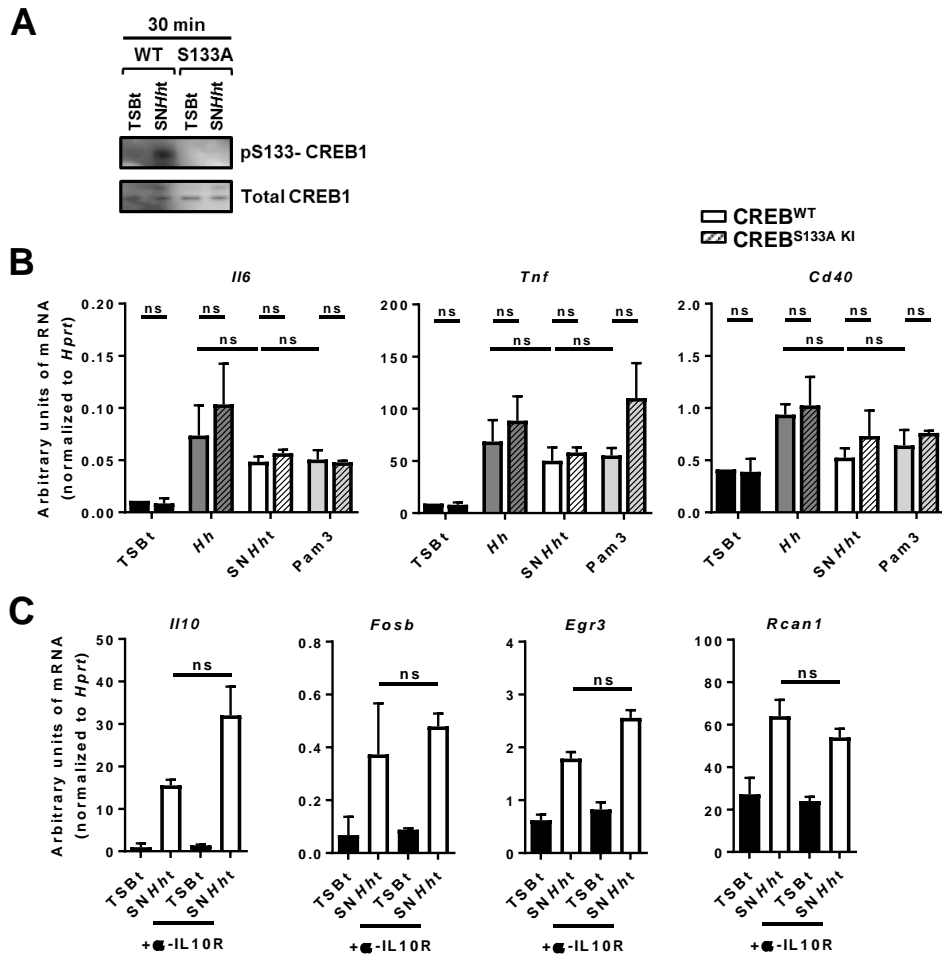

**Figure S5. The induction of CREB target genes by *H. hepaticus* polysaccharide is not dependent on IL-10R signaling. Related to Figure 6. (A)** Western Blot showing the absence of CREB1 S133 phosphorylation in BMDMs from conditional CREB<sup>S133A KI</sup> *vav-cre*<sup>+</sup> mice after stimulation for 30 min with TSBt or SNHht. **(B)** mRNA levels of *Il6*, *Tnf* and *Cd40* genes in BMDMs from conditional CREB<sup>WT</sup> and CREB<sup>S133A KI</sup> *vav-cre*<sup>+</sup> mice after stimulation for 1 h with TSBt, *Hh*, SNHht or Pam3 (one of three independent experiments). Two-way ANOVA and Sidak's and Tukey's multiple comparisons tests,  $p < 0.05$ . **(C)** Induction of *Il10*, *Fosb*, *Egr3*, and *Rcan1* mRNA expression in WT BMDMs pre-treated for 2 h with a polyclonal anti-IL-10R blocking antibody (anti-IL-10R) before stimulation with TSBt or SNHht for 3 h. One of three independent experiments. Mann-Whitney test,  $p < 0.05$ . Mean  $\pm$  SD.

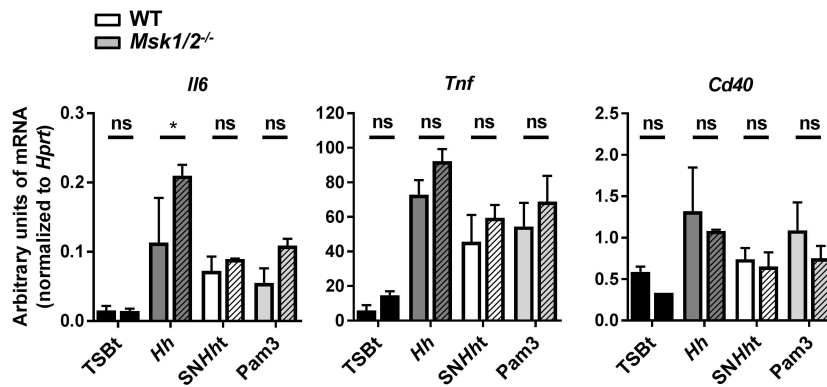

**Figure S6. Induction of MSK1/2-independent genes by *H. hepaticus* polysaccharide. Related to Figure 7.** mRNA levels of *Il6*, *Tnf*, *Cd40* genes in BMDMs from WT or MSK1/2<sup>-/-</sup> mice after stimulation for 1 h with TSBt, *Hh*, *SNHht* or Pam3. One of three independent experiments. Two-way ANOVA and Sidak's multiple comparisons test,  $p < 0.05$ . Mean  $\pm$  SD.
